# Supplementary material for: Three Years of Continuous Vital Signs Monitoring on the General Surgical Ward: Is It Sustainable? A Qualitative Study
Source: MDPI journal article supplement (doi:10.3390/jcm13020439), 2024-01-13
Supplement: s1 [file s1]

## Supplementary S3. Model of Gagnon.

Table 1. List of factors related to the success or failure of ICT adoption [1].

| Indicator                                         | Subindicator                                                     |
|---------------------------------------------------|------------------------------------------------------------------|
| 1. Factors related to ICT                         |                                                                  |
| Design and technical concerns                     |                                                                  |
| Characteristics of the innovation                 | Relative advantage (usefulness)                                  |
|                                                   | Compatibility (with work process, values)                        |
|                                                   | Ease of use / complexity                                         |
|                                                   | Triability                                                       |
|                                                   | Observability                                                    |
| System reliability                                |                                                                  |
| Interoperability                                  |                                                                  |
| Legal issues                                      | Confidentiality - privacy concerns                               |
|                                                   | Other legal issues (including security)                          |
| Evidence regarding benefits of IT                 |                                                                  |
| Validity of the resources                         | Scientific quality of the information resources                  |
|                                                   | Content available (completeness)                                 |
|                                                   | Appropriate for the users (relevance)                            |
| Cost issues                                       |                                                                  |
| Environmental issues                              |                                                                  |
| 2. Individual factors of healthcare professionals |                                                                  |
| Knowledge                                         | Awareness of the existence and/or objectives of the ICT          |
|                                                   | Familiarity with ICT                                             |
|                                                   | Familiarity with technologies in general                         |
| Attitude                                          | Agreement with the particular ICT                                |
|                                                   | Applicability to the clinical situation                          |
|                                                   | Confidence in ICT developer                                      |
|                                                   | Challenge to autonomy                                            |
|                                                   | Impact on clinical uncertainty                                   |
|                                                   | Time consuming/ time saving                                      |
|                                                   | Outcome expectancy (use of the ICT leads to desired outcome)     |
|                                                   | Motivation to use the ICT (readiness) /resistance to use the ICT |
|                                                   | Self-efficacy (believes in one's competence to use the ICT)      |
|                                                   | Impact on professional security                                  |

|                                   |                                                                                              |
|-----------------------------------|----------------------------------------------------------------------------------------------|
|                                   | Agreement with ICTs in general (welcoming/resistant)                                         |
| Socio-demographic characteristics |                                                                                              |
|                                   | Age                                                                                          |
|                                   | Gender                                                                                       |
|                                   | Experience                                                                                   |
|                                   | Ethnicity                                                                                    |
|                                   | Other                                                                                        |
| 3. Human environment              |                                                                                              |
| Factors associated with patients  |                                                                                              |
|                                   | Patients' attitudes and preferences regarding ICT                                            |
|                                   | Patient/health professional interaction                                                      |
|                                   | Applicability to patients' characteristics                                                   |
|                                   | Other factors associated with patients                                                       |
| Factors associated with peers     |                                                                                              |
|                                   | Attitude of colleagues about ICT                                                             |
|                                   | Support and promotion of ICT by colleagues                                                   |
|                                   | Others factors associated with peers (relations between colleagues)                          |
| 4. Organisational aspects         |                                                                                              |
| Internal environment              |                                                                                              |
|                                   | Characteristics of the structure of work                                                     |
|                                   | Setting of care (hospital, outpatient, primary care)                                         |
|                                   | Practice size                                                                                |
|                                   | Status (university/other, private/public)                                                    |
|                                   | Physician salary status and reimbursement                                                    |
|                                   | Work (nature of work)                                                                        |
|                                   | Time constraints and workload                                                                |
|                                   | Work flexibility                                                                             |
|                                   | Relation between different health professionals (including role boundaries, change in tasks) |
|                                   | Professional culture                                                                         |
|                                   | Skill -Staff                                                                                 |
|                                   | Leadership                                                                                   |
|                                   | Staff issues (stability, shortage)                                                           |
|                                   | Resources availability                                                                       |
| External environment              |                                                                                              |
|                                   | Financing of ICT / financial support                                                         |
|                                   | Interorganisational relations                                                                |
|                                   | Health care policies                                                                         |

1. Gagnon, M.P., Desmartis, M., Labrecque, M., Car, J., Pagliari, C., Pluye, P., et al. Systematic review of factors influencing the adoption of information and communication technologies by healthcare professionals. *J Med Syst.* **2012** 36, 241–277.
