# Supplementary material for: Three Years of Continuous Vital Signs Monitoring on the General Surgical Ward: Is It Sustainable? A Qualitative Study
Source: MDPI journal article supplement (doi:10.3390/jcm13020439), 2024-01-13
Supplement: s1 [file s1]

## Supplementary S1. Graphical presentation of the Visi Mobile

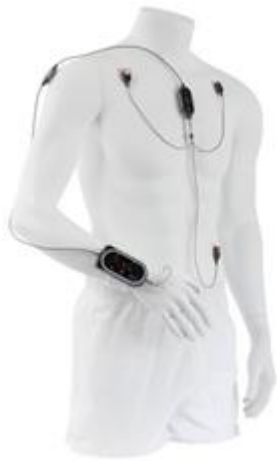

Figure S1. the VisiMobile (Sotera Wireless) having sensors on the chest and thumb, and a battery on the wrist.

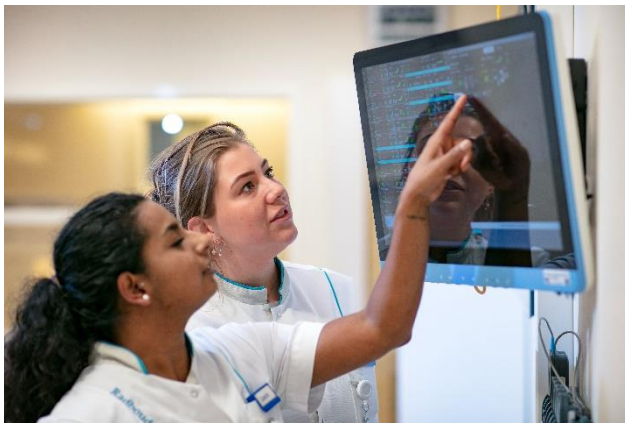

Figure S2. nurses assess the vital signs at a monitor in the nursing station (nurses gave permission for publication)
